# Supplementary material for: Understanding isoprene photooxidation using observations and modeling over a subtropical forest in the southeastern US
Source: Copernicus journal article supplement (doi:10.5194/acp-16-7725-2016), 2016-06-24
Supplement: Supplementary file 1 [file acp-16-7725-2016-supplement.pdf]

Supplement of Atmos. Chem. Phys., 16, 7725–7741, 2016  
<http://www.atmos-chem-phys.net/16/7725/2016/>  
doi:10.5194/acp-16-7725-2016-supplement  
© Author(s) 2016. CC Attribution 3.0 License.

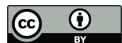

Atmospheric  
Chemistry  
and Physics  
Open Access  
EGU

*Supplement of*

## **Understanding isoprene photooxidation using observations and modeling over a subtropical forest in the southeastern US**

**Luping Su et al.**

*Correspondence to:* John E. Mak ([john.mak@stonybrook.edu](mailto:john.mak@stonybrook.edu))

The copyright of individual parts of the supplement might differ from the CC-BY 3.0 licence.

# 1 1 Algorithms used in ToFIND

## 2 1.1 Peak shape fitting

3 The peak generated by the PTR-TOF-MS is asymmetric and can be mathematically  
4 approximated by peak-shaped functions. Here we choose an empirically transformed  
5 Gaussian function (ETG) model to describe a single peak produced by the instrument (Li,  
6 1997). The ETG is based on the decomposition of Gaussian function into leading and trailing  
7 edge functions. The two functions are weakly combined and subsequently modified, making it  
8 very suitable for approximating asymmetric peak shapes. The ETG is given by:

$$9 \quad f(t) = \frac{H}{\{1 + \lambda_L \exp[k_L(t_L - t)]\}^\alpha + \{1 + \lambda_T \exp[k_T(t - t_T)]\}^\beta - 1} \quad (S1)$$

10 where  $f(t)$  denotes peak function;  $t$  denotes time-of-flight;  $H$  is related to peak height;  $\lambda_L$  and  
11  $\lambda_T$  are pre-exponential parameters;  $k_L$  and  $k_T$  are the parameters related to the speeds of  
12 the rise and fall of the leading and trailing edges, respectively;  $t_L$  and  $t_T$  are the inflection  
13 times of the leading and trailing edges, respectively, and are fixed values;  $\alpha$  and  $\beta$  are the  
14 parameters to further modify the shapes of the leading and trailing edges, respectively. The  
15 ETG features in a weak link between the leading and trailing parts of a single peak, thus is  
16 very flexible and suitable for fitting asymmetric peaks. The values of  $t_L$  and  $t_T$  do not need  
17 to be accurate, here we use the time-of-flight at the full width at half maximum (FWHM) on  
18 the left and right side of a single peak to represent those two values, respectively. There are a  
19 total of seven parameters in each ETG ( $H$ ,  $\lambda_L$ ,  $\lambda_T$ ,  $k_L$ ,  $k_T$ ,  $\alpha$ , and  $\beta$ ), and the rate of  
20 convergence is fast. Levenberg-Marquardt algorithm is used to solve the non-linear least-  
21 squares curve fitting problem. To achieve a sufficiently high speed of the curve fitting,  
22 MINPACK-1 Least Squares Fitting Library in C  
23 (<http://www.physics.wisc.edu/~craigm/idl/cmpfit.html>) is used and integrated into the  
24 ToFIND toolbox through MATLAB-C interface (<http://www.imm.dtu.dk/~guuru/>).

## 25 1.2 Time-of-flight to $m/z$ conversion

26 In the field free area of the TOF-MS, the time-of-flight of ions show slow drift due to the  
27 change in the length of the ions' flight path caused by temperature variations in this area. To  
28 gain a high mass accuracy, continuous mass scale correction is performed on the raw data.  
29 Four well identified peaks: three internal ions ( $H_2^{18}OH^+$ ,  $m/z=21.022$ ,  $NO^+$ ,  $m/z=29.997$ ,

1 and H216OH218OH+,  $m/z=39.033$ ), and one externally added compound (diiodomethane,  
2 fragmented at ion CH2I+,  $m/z=140.920$ ) are used for mass scale correction peaks. The time-  
3 of-flight  $t$  and mass scale  $m/z$  are related to each other through:

$$4 \quad t = a\sqrt{m/z} + b \quad (S2)$$

5 For each raw HDF5 data file, every 3 of the 300 spectra are averaged to produce 100 spectra.  
6 For each of the 100 spectra, the peak shape fitting algorithm described above is applied to  
7 find the peak centers ( $t$ ) of the four mass scale correction peaks. Since the exact  $m/z$  values  
8 for each peak are known, the values of  $a$  and  $b$  in Eqn. A2 are calculated through linear least-  
9 squares method. The relative mass error (RME) is less than 10 parts per million (ppm) over  
10 the spectrum after mass scale calibration.

### 11 **1.3 Peak detection**

12 After time-of-flight to  $m/z$  conversion, the 300 mass scale corrected spectra are aligned with  
13 each other, and averaged to produce one single spectrum. A target mass list is predefined  
14 which includes a series exact  $m/z$  of interested VOCs compounds (e.g., methanol, acetone,  
15 isoprene, MVK+MACR, and monoterpenes). For one specific target peak, there may be other  
16 peaks co-existing in the same nominal  $m/z$ , a peak searching routine is used to find all the  
17 peaks including the target peak within a certain range of one nominal  $m/z$ . The mass list is  
18 then updated and used for peak shape fitting (see next section).

### 19 **1.4 Signal integration**

20 A few issues exist when performing signal integration on each individual peak: (1), due to the  
21 low counts rate in each individual 1 Hz spectrum, the peak shape fitting algorithm often fails  
22 to converge or generate desirable fitting results when applied to a single spectrum, (2),  
23 interference exists between two neighbouring peaks when they overlap with each other due to  
24 the limited mass resolution of the PTR-TOF-MS. To improve the accuracy of the peak fitting  
25 result, the updated peak list is used and the peak shape fitting algorithm is applied to the  
26 averaged spectrum described above to produce a peak function. Based on this, the FWHM for  
27 each peak is recalculated and used to define the peak integration boundaries. For the  
28 asymmetrical Gaussian-shaped peak which is typical for the PTR-TOF-MS, the integration  
29 boundaries on the left and right sides are processed separately. With the updated FWHM  
30 values for all the peaks, the ratios of the portion before the peak center to the portion after the

1 peak center are calculated and averaged ( $r$ ). The integration boundary on the left side is  
 2 defined as  $a \times \text{FWHM} \times r$  to the left of the peak center. The integration boundary on the right  
 3 side is defined as  $a \times \text{FWHM} \times (1-r)$  to the right of the peak center. Add a figure to describe the  
 4 procedure. The factor  $a$  is set to 4 for single peak and 3 for multiple peaks. The factor value is  
 5 reduced for multiple peaks to lower the interference of neighbouring peaks.

## 6 **2 Conversion rate of ISOPOOH to $\text{C}_4\text{H}_7\text{O}^+$ in PTR-TOF-MS**

7 To quantify the conversion rate of ISOPOOH to  $\text{C}_4\text{H}_7\text{O}^+$  when using PTR-TOF-MS, an  
 8 experiment was carried out by using 1,2-ISOPOOH standard during the Focused Isoprene  
 9 eXperiment at the California Institute of Technology (FIXCIT) campaign (Nguyen et al.,  
 10 2014). The same PTR-TOF-MS was used to perform the measurements. There were three  
 11 steps (Figure S0): 1, sampling from ISOPOOH-free air; 2, sampling from Teflon bag filled  
 12 with ISOPOOH standard under room temperature through a 1/8 inch O.D. PFA tubing (length  
 13  $\sim 40$  cm) at  $\sim 25$  °C; 3, same setup as 2 except that the PFA tubing is submerged in cold trap at  
 14  $-40$  °C. The decreasing of  $m/z=71.049$  signal in step 3 is due to the condensing of ISOPOOH  
 15 onto the PFA tubing wall surface under low temperature as a result of its low vapor pressure.

16 Signals at peak  $m/z=71.049$  are integrated using method described above. To ensure the  
 17 robustness of the results, two independent methods are used to convert the integrated signal  
 18 (in unit of cps) at peak  $m/z=71.049$  to its mixing ratio (in unit of ppbv).

### 19 **2.1 Using reaction rate coefficient**

$$20 \quad \text{VOC}[\text{ppbv}] = 10^9 \times \frac{\text{VOC}[\text{molec. cm}^{-3}]}{\text{air}[\text{molec. cm}^{-3}]} \quad (\text{S3})$$

$$21 \quad \text{VOC}[\text{molec. cm}^{-3}] = \frac{1}{kt} \times \frac{\text{VOCH}^+[\text{cps}]}{\text{H}_3\text{O}^+[\text{cps}]} \times \sqrt{\frac{m/z_{\text{H}_3\text{O}^+}}{m/z_{\text{VOCH}^+}}} \times \frac{\text{TR}_{\text{H}_3\text{O}^+}}{\text{TR}_{\text{VOCH}^+}} \quad (\text{S4})$$

$$22 \quad t = \frac{l^2}{\mu_0 U_{\text{drift}}} \times \frac{T_0}{T_{\text{drift}}} \times \frac{P_{\text{drift}}}{P_0} \quad (\text{S5})$$

$$23 \quad \text{air}[\text{molec. cm}^{-3}] = \frac{N_A}{22400} \times \frac{T_0}{T_{\text{drift}}} \times \frac{P_{\text{drift}}}{P_0} \quad (\text{S6})$$

24 the meaning of the symbols are listed as follows,

25

| Symbol                              | Value                  | Unit                                            | Description                                                             |
|-------------------------------------|------------------------|-------------------------------------------------|-------------------------------------------------------------------------|
| VOC[ppbv]                           | -                      | ppbv                                            | VOC mixing ratio                                                        |
| VOC[molec. cm <sup>-3</sup> ]       | -                      | molec. cm <sup>-3</sup>                         | VOC number density                                                      |
| air[molec. cm <sup>-3</sup> ]       | -                      | molec. cm <sup>-3</sup>                         | air number density                                                      |
| VOCH <sup>+</sup> [cps]             | -                      | cps                                             | measured VOCH <sup>+</sup> count rates                                  |
| H <sub>3</sub> O <sup>+</sup> [cps] | -                      | cps                                             | measured primary ion count rates                                        |
| $\mu_0$                             | 2.8                    | cm <sup>2</sup> V <sup>-1</sup> s <sup>-1</sup> | reduced mobility                                                        |
| $p_0$                               | 1013.25                | mbar                                            | air pressure at standard condition                                      |
| $p_{drift}$                         | 2.20                   | mbar                                            | drift tube pressure                                                     |
| $T_0$                               | 273.15                 | K                                               | temperature at standard condition                                       |
| $T_{drift}$                         | 332.6                  | K                                               | drift tube temperature                                                  |
| $N_A$                               | $6.022 \times 10^{23}$ | 1                                               | Avogadro number                                                         |
| $l$                                 | 9.3                    | cm                                              | length of the reaction chamber                                          |
| $TR_{H_3O^+}$                       | 0.67                   | 1                                               | transmission factor of H <sub>3</sub> O <sup>+</sup>                    |
| $TR_{VOCH^+}$                       | 1.00                   | 1                                               | transmission factor of VOCH <sup>+</sup>                                |
| $k$                                 | $3.2 \times 10^{-9a}$  | cm <sup>3</sup> s <sup>-1</sup>                 | reaction rate coefficient between VOC and H <sub>3</sub> O <sup>+</sup> |

1 <sup>a</sup>Data obtained from Cappellin et al. (2012).

## 2 **2.2 Using sensitivity**

$$3 \quad \text{VOC[ppbv]} = \frac{\text{VOCH}^+[\text{ncps}]}{\text{Sensitivity}_{\text{VOCH}^+}[\text{ncps ppbv}^{-1}]} \quad (\text{S7})$$

$$4 \quad \text{VOCH}^+[\text{ncps}] = \frac{\text{VOCH}^+[\text{cps}] \times 10^6}{\text{H}_3\text{O}^+[\text{cps}]} \times \sqrt{\frac{m/z_{\text{H}_3\text{O}^+}}{m/z_{\text{VOCH}^+}}} \quad (\text{S8})$$

5 where  $\text{Sensitivity}_{\text{C}_4\text{H}_7\text{O}^+} = 26.83 \text{ ncps ppbv}^{-1}$  by using standard gas calibration.

1 **2.3 Conversion rate**

2 The mixing ratios (mean  $\pm$  1 standard deviation) of m/z71.049 during experiment step 2  
3 (Figure S0) are calculated to be  $36.20 \pm 1.62$  ppbv and  $34.89 \pm 1.54$  ppbv by using reaction  
4 rate coefficient and sensitivity, respectively. The difference of mixing ratios between the two  
5 methods is within 4%. The mixing ratio of m/z71.049 obtained from the sensitivity method is  
6 used to calculate the conversion rate of ISOPOOH. The mixing ratio of 1,2-ISOPOOH in the  
7 Teflon bag is quantified to be 250 ppbv ( $\pm 40\%$  uncertainty) (Nguyen et al., 2014) (A. Teng,  
8 personal communication). The conversion rate of ISOPOOH to  $C_4H_7O^+$  is estimated to be  
9 14% (+14%/-6%).

10  
11  
12  
13  
14  
15  
16  
17  
18  
19  
20  
21  
22  
23  
24  
25  
26  
27

1

2

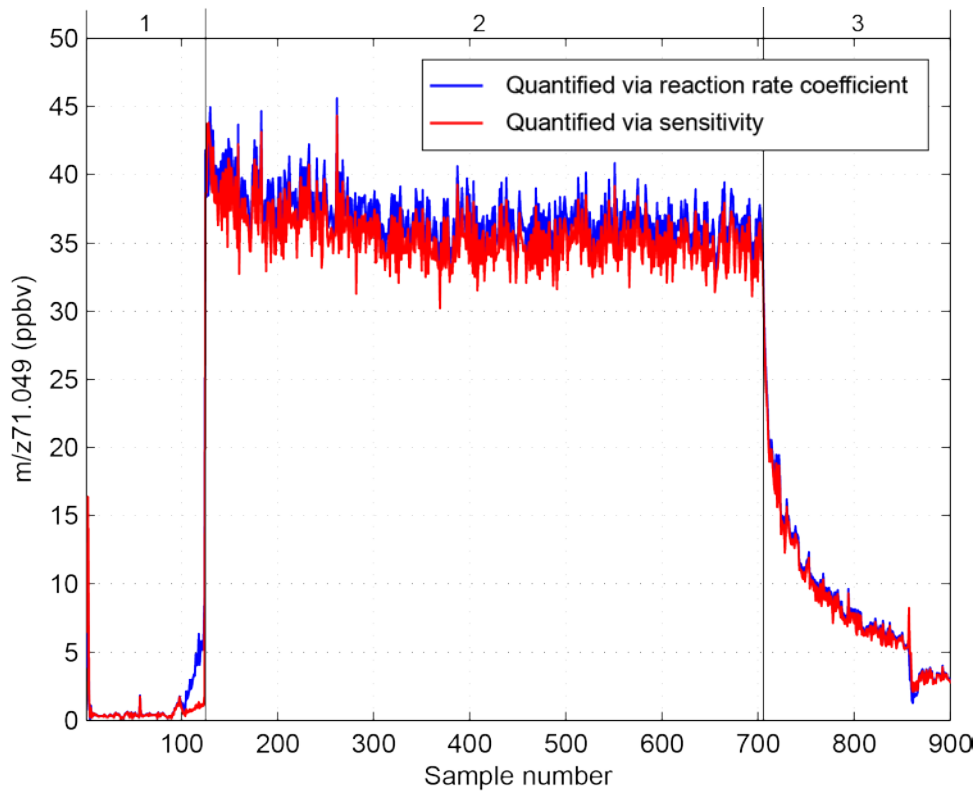

3

4 Figure S0. The mixing ratios of  $m/z71.049$  during an ISOPOOH cold trap experiment. 1,  
5 sampling from ISOPOOH-free air; 2, sampling from Teflon bag filled with ISOPOOH  
6 standard under room temperature through a 1/8 inch OD PFA tubing (length ~40 cm) at ~25  
7 °C; 3, same setup as 2 except that the PFA tubing is submerged in cold trap at -40 °C.

8

9

10

11

12

13

14

15

16

1  
2  
3  
4  
5  
6  
7  
8  
9  
10  
11

Table S1. Other observations during the 2013 SAS campaign used in this study. Days used are during June 5, 6, 8, 10-13 unless otherwise specified in the table.

| Parameter                               | Platform              | Instrument/technique                                | Uncertainty                                                      | Days used           | Institute                       |
|-----------------------------------------|-----------------------|-----------------------------------------------------|------------------------------------------------------------------|---------------------|---------------------------------|
| VOC                                     | Airborne (NCAR C-130) | Proton Transfer Reaction Mass Spectrometer (PTR-MS) | 20%                                                              | June 12             | NCAR, NOAA                      |
| ISOPN                                   | SEARCH site           | chemical ionization mass spectrometer (CIMS)        | 25%                                                              | June 5, 6, 8, 10-13 | Purdue University               |
| O <sub>3</sub> , NO <sub>x</sub>        | Airborne (NCAR C-130) | chemiluminescence                                   | 10% for NO, 15% for NO <sub>2</sub> , 5% for O <sub>3</sub>      | June 12             | NCAR                            |
| O <sub>3</sub> , NO <sub>x</sub>        | SEARCH tower          | ThermoScientific 49i, 42i                           | 5.5% for NO, 15.0% for NO <sub>2</sub> , 6.1% for O <sub>3</sub> | June 5, 6, 8, 10-13 | ARA                             |
| OH                                      | SEARCH tower          | laser induced fluorescence (LIF)                    | 32%                                                              | June 5, 6, 8, 10-13 | Pennsylvania State University   |
| HCHO                                    | SEARCH tower          | Fiber - Laser Induced Fluorescence                  | 15%                                                              | June 14             | University of Wisconsin-Madison |
| Surface heat flux                       | AABC tower            | Integrated Surface Flux System (ISFS)               |                                                                  | June 10-13          | NCAR                            |
| Potential temperature                   | AABC tower            | ISFS                                                |                                                                  | June 10-13          | NCAR                            |
| specific humidity                       | Airborne (NCAR C-130) | onboard sensor                                      |                                                                  | June 12             | NCAR                            |
| Potential temperature specific humidity | Airborne (NCAR C-130) | onboard sensor                                      |                                                                  | June 12             | NCAR                            |
| Photolysis rates                        | Airborne (NCAR C-130) | onboard sensor                                      |                                                                  | June 12             | NCAR                            |
| Boundary layer height                   | SEARCH                | Ceilometer, Integrated Sounding System (ISS)        | 13.0% for ceilometer                                             | June 10-13          | ARA, NCAR                       |



1  
2  
3  
4

Table S2. Chemical species in the complex scheme. See more details at [http://wiki.seas.harvard.edu/geos-chem/index.php/New\\_isoprene\\_scheme](http://wiki.seas.harvard.edu/geos-chem/index.php/New_isoprene_scheme)

| Species | Formula                                                                    | Note                                                         |
|---------|----------------------------------------------------------------------------|--------------------------------------------------------------|
| A3O2    | CH <sub>3</sub> CH <sub>2</sub> CH <sub>2</sub> OO                         | primary RO <sub>2</sub> from C <sub>3</sub> H <sub>8</sub>   |
| ACET    | CH <sub>3</sub> C(O)CH <sub>3</sub>                                        | acetone                                                      |
| ACTA    | CH <sub>3</sub> C(O)OH                                                     | acetic acid                                                  |
| ALD2    | CH <sub>3</sub> CHO                                                        | acetaldehyde                                                 |
| ALK4    | RH                                                                         | ≥C <sub>4</sub> alkanes                                      |
| ATO2    | CH <sub>3</sub> C(O)CH <sub>2</sub> O <sub>2</sub>                         | RO <sub>2</sub> from acetone                                 |
| ATO2OH  | CH <sub>3</sub> C(O)CH <sub>2</sub> OOH                                    | ATO <sub>2</sub> peroxide                                    |
| B3O2    | CH <sub>3</sub> CH(OO)CH <sub>3</sub>                                      | secondary RO <sub>2</sub> from C <sub>3</sub> H <sub>8</sub> |
| C2H6    | C <sub>2</sub> H <sub>6</sub>                                              | ethane                                                       |
| C3H8    | C <sub>3</sub> H <sub>8</sub>                                              | propane                                                      |
| CH2O    | CH <sub>2</sub> O                                                          | formaldehyde                                                 |
| CH4     | CH <sub>4</sub>                                                            | methane                                                      |
| CO      | CO                                                                         | carbon monoxide                                              |
| CO2     | CO <sub>2</sub>                                                            | carbon dioxide                                               |
| DHMOB   | HOCH <sub>2</sub> C(CH <sub>3</sub> )(OH)C(=O)CHO                          | See Paulot et al., ACP (2009)                                |
| DIBOO   |                                                                            | Dibble peroxy radical                                        |
| EOH     | C <sub>2</sub> H <sub>5</sub> OH                                           | ethanol                                                      |
| ETHLN   | CHOCH <sub>2</sub> ONO <sub>2</sub>                                        | Ethanal nitrate                                              |
| ETO2    | CH <sub>3</sub> CH <sub>2</sub> OO                                         | ethylperoxy radical                                          |
| ETP     | CH <sub>3</sub> CH <sub>2</sub> OOH                                        | ethylhydroperoxide                                           |
| GLYC    | HOCH <sub>2</sub> CHO                                                      | glycoaldehyde (hydroxyacetaldehyde)                          |
| GLYX    | CHOCHO                                                                     | glyoxal                                                      |
| H2      | H <sub>2</sub>                                                             | hydrogen atom                                                |
| H2O     | H <sub>2</sub> O                                                           | water vapor                                                  |
| H2O2    | H <sub>2</sub> O <sub>2</sub>                                              | hydrogen peroxide                                            |
| HAC     | HOCH <sub>2</sub> C(O)CH <sub>3</sub>                                      | hydroxyacetone                                               |
| HCOOH   | HCOOH                                                                      | formic acid                                                  |
| HC5     | HOCH <sub>2</sub> CH=C(CH <sub>3</sub> )CHO                                | Hydroxycarbonyl with 5C                                      |
| HC5OO   |                                                                            | Peroxy radical from HC5 (old IAO2?)                          |
| HNO2    | HONO                                                                       | nitrous acid                                                 |
| HNO3    | HNO <sub>3</sub>                                                           | nitric acid                                                  |
| HNO4    | HNO <sub>4</sub>                                                           | pernitric acid                                               |
| HO2     | HO <sub>2</sub>                                                            | hydroperoxyl radical                                         |
| IALD    | HOCH <sub>2</sub> C(CH <sub>3</sub> )=CHCHO                                | hydroxy carbonyl alkenes from isoprene                       |
| IAP     | HOCH <sub>2</sub> C(CH <sub>3</sub> )(OOH)CH(OH)CHO                        | peroxide from IAO <sub>2</sub>                               |
| IEPOX   |                                                                            | Isoprene epoxide                                             |
| IEPOXOO |                                                                            | RO <sub>2</sub> from IEPOX                                   |
| INO2    | O <sub>2</sub> NOCH <sub>2</sub> C(OO)(CH <sub>3</sub> )CH=CH <sub>2</sub> | RO <sub>2</sub> from ISOP+NO <sub>3</sub>                    |

|                                   |                                     |                                                             |
|-----------------------------------|-------------------------------------|-------------------------------------------------------------|
| INPN                              | $O_2NOCH_2C(OOH)(CH_3)CH=CH_2$      | peroxide from INO <sub>2</sub>                              |
| ISN1                              |                                     | nighttime isoprene nitrate                                  |
| ISNOOA                            |                                     | peroxy radical from ISN1                                    |
| ISNOOB                            |                                     | peroxy radical from ISN1                                    |
| ISNOHOO                           |                                     | peroxy radical from ISN1                                    |
| ISNP                              | $HOCH_2C(OOH)(CH_3)CH(ONO_2)CH_2OH$ | peroxide from ISOPNBO <sub>2</sub> and ISOPNDO <sub>2</sub> |
| ISOP                              | $CH_2=C(CH_3)CH=CH_2$               | isoprene                                                    |
| ISOPNB                            | $C_5H_9NO_4$                        | Isoprene nitrate Beta                                       |
| ISOPND                            | $C_5H_9NO_4$                        | Isoprene nitrate Delta                                      |
| KO <sub>2</sub>                   | RO <sub>2</sub> from >3 ketones     | RO <sub>2</sub> from >3 ketones                             |
| M                                 |                                     | for three body reactions                                    |
| MACR                              | $CH_2=C(CH_3)CHO$                   | methacrolein                                                |
| MACRN                             | $HOCH_2C(ONO_2)(CH_3)CHO$           | Nitrate from MVK                                            |
| MAN <sub>2</sub>                  | $HOCH_2C(ONO_2)(CH_3)CHO$           | RO <sub>2</sub> from MACR+NO <sub>3</sub>                   |
| MAO <sub>3</sub>                  | $CH_2=C(CH_3)C(O)OO$                | peroxyacyl from MVK and MACR                                |
| MAOP                              | $CH_2=C(CH_3)C(O)OOH$               | peroxide from MAO <sub>3</sub>                              |
| MAOPO <sub>2</sub>                | $CH_2OH-CHOO*CH_3C(O)OOH$           | Peroxy radical from MAOP (addition on the double bond)      |
| MAP                               | $CH_3C(O)OOH$                       | peroxyacetic acid                                           |
| MCO <sub>3</sub>                  | $CH_3C(O)OO$                        | peroxyacetyl radical                                        |
| MEK                               | RC(O)R                              | >3 ketones                                                  |
| MGLY                              | $CH_3COCHO$                         | methylglyoxal                                               |
| MNO <sub>3</sub>                  | $CH_3ONO_2$                         | methylnitrate                                               |
| MOBA                              | $HOC(=O)C(CH_3)=CHCHO$              | 5C acid from isoprene                                       |
| MOBAOO                            |                                     | RO <sub>2</sub> from MOBA                                   |
| MO <sub>2</sub>                   | $CH_3O_2$                           | methylperoxy radical                                        |
| MOH                               | $CH_3OH$                            | methanol                                                    |
| MP                                | $CH_3OOH$                           | methylhydroperoxide                                         |
| MRO <sub>2</sub>                  | $HOCH_2C(OO)(CH_3)CHO$              | RO <sub>2</sub> from MACR+OH                                |
| MRP                               | $HOCH_2C(OOH)(CH_3)CHO$             | peroxide from MRO <sub>2</sub>                              |
| MVK                               | $CH_2=CHC(=O)CH_3$                  | methylvinylketone                                           |
| MVKN                              | $HOCH_2CH(ONO_2)C(=O)CH_3$          | Nitrate from MACR                                           |
| N <sub>2</sub>                    | N <sub>2</sub>                      | nitrogen                                                    |
| N <sub>2</sub> O                  | N <sub>2</sub> O                    | nitrous oxide                                               |
| N <sub>2</sub> O <sub>5</sub>     | N <sub>2</sub> O <sub>5</sub>       | dinitrogen pentoxide                                        |
| NH <sub>2</sub>                   | NH <sub>2</sub>                     | ammonia radical                                             |
| NH <sub>3</sub>                   | NH <sub>3</sub>                     | ammonia                                                     |
| NO                                | NO                                  | nitric oxide                                                |
| NO <sub>2</sub>                   | NO <sub>2</sub>                     | nitrogen dioxide                                            |
| NO <sub>3</sub>                   | NO <sub>3</sub>                     | nitrate radical                                             |
| O <sub>2</sub>                    | O <sub>2</sub>                      | molecular oxygen                                            |
| O <sub>2</sub> CH <sub>2</sub> OH | O <sub>2</sub> CH <sub>2</sub> OH   | produced by CH <sub>2</sub> O+HO <sub>2</sub>               |
| O <sub>3</sub>                    | O <sub>3</sub>                      | ozone                                                       |
| OH                                | OH                                  | hydroxyl radical                                            |
| PAN                               | $CH_3C(O)OONO_2$                    | peroxyacetylnitrate                                         |
| PMN                               | $CH_2=C(CH_3)C(O)OONO_2$            | peroxymethacryloyl nitrate (MPAN)                           |

|        |                        |                                                         |
|--------|------------------------|---------------------------------------------------------|
| PO2    | HOCH2CH(OO)CH3         | RO2 from isoprene                                       |
| PP     | HOCH2CH(OOH)CH3        | peroxide from PO2                                       |
| PPN    | CH3CH2C(O)OONO2        | peroxypropionyl nitrate                                 |
| PRN1   | O2NOCH2CH(OO)CH3       | RO2 from propene + NO3                                  |
| PRPE   | C3H6                   | ≥C4 alkenes                                             |
| PRPN   | O2NOCH2CH(OOH)CH3      | peroxide from PRN1                                      |
| PROPNN | CH3C(=O)CH2ONO2        | Propanone nitrate                                       |
| PYAC   | CH3COCO OH             | Pyruvic acid                                            |
| R4N1   | RO2 from R4N2          | RO2 from R4N2                                           |
| R4N2   | RO2NO                  | ≥C4 alkyl nitrates                                      |
| R4O2   | RO2 from ALK4          | RO2 from ALK4                                           |
| R4P    | CH3CH2CH2CH2OOH        | peroxide from R4O2                                      |
| RA3P   | CH3CH2CH2OOH           | peroxide from A3O2                                      |
| RB3P   | CH3CH(OOH)CH3          | peroxide from B3O2                                      |
| RCHO   | CH3CH2CHO              | >C2 aldehydes                                           |
| RCO3   | CH3CH2C(O)OO           | peroxypropionyl radical                                 |
| RCOOH  | C2H5C(O)OH             | >C2 organic acids                                       |
| RIO1   | HOCH2C(OO)(CH3)CH=CHOH | RO2 from isoprene oxidation products                    |
| RIO2   | HOCH2C(OO)(CH3)CH=CH2  | RO2 from isoprene (named as ISOPO2 in the literature)   |
| RIP    | HOCH2C(OOH)(CH3)CH=CH2 | peroxide from RIO2 (named as ISOPOOH in the literature) |
| ROH    | C3H7OH                 | >C2 alcohols                                            |
| RP     | CH3CH2C(O)OOH          | peroxide from RCO3                                      |
| VRO2   | HOCH2CH(OO)C(O)CH3     | RO2 from MVK+OH                                         |
| VRP    | HOCH2CH(OOH)C(O)CH3    | peroxide from VRO2                                      |

1  
2  
3  
4  
5  
6  
7  
8  
9  
10  
11  
12

1  
2  
3

Table S3. The complex chemical scheme used in MXLCH.

| Reaction                                                              | Reaction rate                                               |
|-----------------------------------------------------------------------|-------------------------------------------------------------|
| $O + O_2 + M \rightarrow O_3 + M$                                     | $6E-34*(300/T)^{2.4}$                                       |
| $O + O_3 \rightarrow 2O_2$                                            | $8.00E-12*\exp(-2060/T)$                                    |
| $O1D + N_2 \rightarrow O + N_2$                                       | $2.10E-11*\exp(115/T)$                                      |
| $O1D + O_2 \rightarrow O + O_2$                                       | $3.20E-11*\exp(70/T)$                                       |
| $O1D + H_2O \rightarrow 2OH$                                          | $2.20E-10$                                                  |
| $H_2 + O1D \rightarrow HO_2 + OH$                                     | $1.10E-10$                                                  |
| $H_2 + OH \rightarrow H_2O + HO_2$                                    | $5.50E-12*\exp(-2000/T)$                                    |
| $O + OH \rightarrow HO_2 + O_2$                                       | $2.20E-11*\exp(120/T)$                                      |
| $HO_2 + O \rightarrow OH + O_2$                                       | $3.00E-11*\exp(200/T)$                                      |
| $OH + O_3 \rightarrow HO_2 + O_2$                                     | $1.70E-12*\exp(-940/T)$                                     |
| $HO_2 + O_3 \rightarrow OH + 2O_2$                                    | $1.00E-14*\exp(-490/T)$                                     |
|                                                                       | $(2.3E-13*\exp(600/T)+1.7E-33*[M]*\exp(1000/T))*(1 + 1.4E-$ |
| $2HO_2 \rightarrow H_2O_2 + O_2$                                      | $21*[H_2O]*\exp(2200/T))$                                   |
| $H_2O_2 + OH \rightarrow H_2O + HO_2$                                 | $2.90E-12*\exp(-160/T)$                                     |
| $OH + HO_2 \rightarrow H_2O + O_2$                                    | $4.80E-11*\exp(250/T)$                                      |
| $2OH \rightarrow H_2O + O$                                            | $4.20E-12*\exp(-240/T)$                                     |
| $2OH \rightarrow H_2O_2$                                              | $6.29E-12$                                                  |
| $N_2O + O1D \rightarrow N_2 + O_2$                                    | $4.90E-11$                                                  |
| $N_2O + O1D \rightarrow 2NO$                                          | $6.70E-11$                                                  |
| $NO + HO_2 \rightarrow NO_2 + OH$                                     | $3.50E-12*\exp(250/T)$                                      |
| $NO + O_3 \rightarrow NO_2 + O_2$                                     | $3.00E-12*\exp(-1500.0/T)$                                  |
| $NO_2 + O \rightarrow NO + O_2$                                       | $5.60E-12*\exp(180/T)$                                      |
| $NO_2 + O_3 \rightarrow NO_3 + O_2$                                   | $1.20E-13*\exp(-2450/T)$                                    |
| $NO_3 + HO_2 \rightarrow OH + NO_2$                                   | $2.30E-12*\exp(170/T)$                                      |
| $NO_2 + NO_3 \rightarrow N_2O_5$                                      | $1.16E-12$                                                  |
| $N_2O_5 \rightarrow NO_2 + NO_3$                                      | $4.70E-02$                                                  |
| $NO_2 + OH \rightarrow HNO_3$                                         | $3.50E-12*\exp(340/T)$                                      |
| $HNO_3 + OH \rightarrow NO_3$                                         | $1.59E-13$                                                  |
| $NO_3 + NO \rightarrow 2NO_2$                                         | $1.50E-11*\exp(170/T)$                                      |
| $NO_2 + HO_2 \rightarrow HO_2NO_2$                                    | $1.37E-12$                                                  |
| $HO_2NO_2 + OH \rightarrow H_2O + NO_2 + O_2$                         | $1.30E-12*\exp(380/T)$                                      |
| $HO_2NO_2 \rightarrow HO_2 + NO_2$                                    | $8.50E-02$                                                  |
| $CH_4 + OH \rightarrow MO_2 + H_2O$                                   | $2.45E-12*\exp(-1775/T)$                                    |
| $CH_4 + O1D \rightarrow .75MO_2 + .75OH + .25CH_2O + .4HO_2 + .05H_2$ | $1.50E-10$                                                  |
| $MO_2 + NO \rightarrow CH_2O + NO_2 + HO_2$                           | $2.80E-12*\exp(300/T)$                                      |
| $2MO_2 \rightarrow 2CH_2O + 2HO_2$                                    | $5.00E-13*\exp(-424/T)$                                     |
| $2MO_2 \rightarrow CH_2O + MOH$                                       | $1.90E-14*\exp(706/T)$                                      |
| $MO_2 + HO_2 \rightarrow MP + O_2$                                    | $4.10E-13*\exp(750/T)$                                      |
| $MP + OH \rightarrow .7MO_2 + .3OH + .3CH_2O + H_2O$                  | $3.80E-12*\exp(200/T)$                                      |

---

|                                                                                                              |                                  |
|--------------------------------------------------------------------------------------------------------------|----------------------------------|
| CH2O + OH -> CO + H2O + HO2                                                                                  | 9.00E-12                         |
| CO + OH -> (CO2) + HO2                                                                                       | 2.40E-13                         |
| MOH + OH -> HO2 + CH2O                                                                                       | 7.30E-12*exp(-620/T)             |
| ISOP + OH -> RIO2                                                                                            | 3.1E-11*exp(350/T)               |
| MACR + OH -> 0.53MAO3 + 0.47MRO2                                                                             | 8.0E-12*exp(380/T)               |
| MVK + OH -> VRO2                                                                                             | 2.6E-12*exp(610/T)               |
| PMN + OH -> HAC + CO + NO2                                                                                   | 2.90E-11                         |
| GLYC + OH -> 0.732CH2O + (0.361CO2) + 0.505CO + 0.227OH + 0.773HO2 + 0.134GLYX + 0.134HCOOH                  | 6.54E-12                         |
| GLYC + OH -> HCOOH + OH + CO                                                                                 | 1.45E-12                         |
| GLYX + OH -> HO2 + 2CO                                                                                       | 3.1E-12*exp(340/T)               |
| HAC + OH -> MGLY + HO2                                                                                       | 1.81E-12*exp(305/T)              |
| HAC + OH -> 0.5HCOOH + OH + 0.5ACTA + (0.5CO2) + 0.5CO + 0.5MO2                                              | 3.43E-13*exp(305/T)              |
| PRPN + OH -> 0.209PRN1 + 0.791OH + 0.791PROPNN                                                               | 8.78E-12*exp(200/T)              |
| ETP + OH -> 0.64OH + 0.36ETO2 + 0.60ALD2                                                                     | 5.18E-12*exp(200/T)              |
| RA3P + OH -> 0.64OH + 0.36A3O2 + 0.64RCHO                                                                    | 5.18E-12*exp(200/T)              |
| RB3P + OH -> 0.791OH + 0.209B3O2 + 0.791ACET                                                                 | 8.78E-12*exp(200/T)              |
| R4P + OH -> 0.791OH + 0.209R4O2 + 0.791RCHO                                                                  | 8.78E-12*exp(200/T)              |
| RP + OH -> RCO3                                                                                              | 6.13E-13*exp(200/T)              |
| PP + OH -> 0.791OH + 0.209PO2 + 0.791HAC                                                                     | 8.78E-12*exp(200/T)              |
| RIP + OH -> 0.387RIO2 + 0.613OH + 0.613HC5                                                                   | 4.75E-12*exp(200/T)              |
| RIP + OH -> OH + IEPOX                                                                                       | 1.9E-11*exp(390/T)               |
| IEPOX + OH -> IEPOXOO                                                                                        | 5.78E-11*exp(-400/T)             |
| IAP + OH -> 0.654OH + 0.654DHMOB + 0.346HC5OO                                                                | 5.31E-12*exp(200/T)              |
| VRP + OH -> 0.791OH + 0.791MEK + 0.209VRO2                                                                   | 8.78E-12*exp(200/T)              |
| MRP + OH -> MRO2                                                                                             | 1.84E-12*exp(200/T)              |
| MRP + OH -> (CO2) + HAC + OH                                                                                 | 4.40E-12*exp(380/T)              |
| MAOP + OH -> MAO3                                                                                            | 6.13E-13*exp(200/T)              |
| MAOP + OH -> MAOPO2                                                                                          | 3.60E-12*exp(380/T)              |
| OH + MAP -> 1.0MCO3                                                                                          | 6.13E-13*exp(200/T)              |
| HC5 + OH -> HC5OO                                                                                            | 3.35E-11*exp(380/T)              |
| ISOPND + OH -> ISOPNDO2                                                                                      | 2.64E-11*exp(380/T)              |
| ISOPNB + OH -> ISOPNBO2                                                                                      | 3.61E-12*exp(380/T)              |
| ISNP + OH -> 0.612OH + 0.612R4N1 + 0.193ISOPNBO2 + 0.193ISOPNDO2                                             | 4.75E-12*exp(200/T)              |
| MVKN + OH -> 0.650HCOOH + NO3 + 0.650MGLY + 0.350CH2O + 0.350PYAC                                            | 1.5E-12*exp(380/T)               |
| MACRN + OH -> 1.0MACRNO2                                                                                     | 1.39E-11*exp(380/T)              |
| DHMOB + OH -> 1.5CO + 1.0HO2 + 0.5HAC + 0.5MEK                                                               | 2.52E-11*exp(410/T)              |
| MOBA + OH -> MOBAOO                                                                                          | 2.79E-11*exp(380/T)              |
| ETHLN + OH -> CH2O + (CO2) + NO2                                                                             | 1.00E-11                         |
| PROPNN + OH -> NO2 + MGLY                                                                                    | 1.00E-15                         |
| ATOOH + OH -> ATO2 + H2O                                                                                     | 2.66E-12*exp(200/T)              |
| ATOOH + OH -> MGLY + OH + H2O                                                                                | 1.14E-12*exp(200/T)              |
| R4N2 + OH -> R4N1 + H2O                                                                                      | 1.60E-12                         |
| RIO2 + NO -> 0.883NO2 + 0.783HO2 + 0.660CH2O + 0.400MVK + 0.260MACR + 0.070ISOPND + 0.047ISOPNB + 0.123HC5 + | 2.70E-12*exp(350/T) <sup>a</sup> |

---

---

|                                                                                                                                                   |                      |
|---------------------------------------------------------------------------------------------------------------------------------------------------|----------------------|
| 0.1DIBOO                                                                                                                                          |                      |
| VRO2 + NO -> 0.88NO2 + 0.35HO2 + 0.35CH2O + 0.53MCO3 + 0.53GLYC + 0.35MGLY + 0.12MVKN                                                             | 2.70E-12*exp(350/T)  |
| MRO2 + NO -> 0.85NO2 + 0.85HO2 + 0.122MGLY + 0.728HAC + 0.728CO + 0.122CH2O + 0.15MACRN                                                           | 2.70E-12*exp(350/T)  |
| MAN2 + NO -> 1.5NO2 + 0.5CH2O + 0.5MGLY + 0.5PROPNN + 0.5CO + 0.5OH                                                                               | 2.70E-12*exp(350/T)  |
| IEPOXOO + NO -> 0.725HAC + 0.275GLYC + 0.275GLYX + 0.275MGLY + 0.125OH + 0.825HO2 + (0.200CO2) + 0.375CH2O + 0.074HCOOH + 0.251CO + NO2           | 2.70E-12*exp(350/T)  |
| MAOPO2 + NO -> 1.0HAC + (1.0CO2) + 1.0OH + 1.0NO2                                                                                                 | 2.48E-12             |
| MAOPO2 + NO -> 1.0HNO3                                                                                                                            | 2.24E-13             |
| HC5OO + NO -> NO2 + 0.216GLYX + 0.234MGLY + 0.234GLYC + 0.216HAC + 0.290DHMOB + 0.170MOBA + 0.090RCHO + HO2 + 0.090CO                             | 2.48E-12             |
| HC5OO + NO -> HNO3                                                                                                                                | 3.42E-13             |
| ISOPNDO2 + NO -> 0.070MACRN + 0.310HCOOH + 0.440HAC + 0.130ETHLN + 0.650CH2O + 1.34NO2 + 0.150GLYC + 0.310NO3 + 0.150PROPNN + 0.340MEK + 0.350HO2 | 2.48E-12             |
| ISOPNDO2 + NO -> HNO3                                                                                                                             | 3.42E-13             |
| ISOPNBO2 + NO -> 0.6GLYC + 0.6HAC + 0.4CH2O + 1.6NO2 + 0.26MACRN + 0.4HO2 + 0.14MVKN                                                              | 2.48E-12             |
| ISOPNBO2 + NO -> HNO3                                                                                                                             | 3.42E-13             |
| MACRNO2 + NO -> 0.08ACTA + 0.08CH2O + 0.15NO3 + 0.07HCOOH + 0.070MGLY + 0.850HAC + 0.85NO2 + (0.93CO2) + 1.0NO2                                   | 2.7E-12*exp(350/T)   |
| DIBOO + NO -> HO2 + NO2 + 0.520GLYC + 0.520MGLY + 0.480HAC + 0.480GLYX                                                                            | 2.48E-12             |
| DIBOO + NO -> HNO3                                                                                                                                | 3.42E-13             |
| MOBAOO + NO -> RCHO + (CO2) + HO2 + NO2                                                                                                           | 2.48E-12             |
| MOBAOO + NO -> HNO3                                                                                                                               | 3.42E-13             |
| MAN2 + NO -> 1.5NO2 + 0.5CH2O + 0.5MGLY + 0.5PROPNN + 0.5CO + 0.5OH                                                                               | 2.70E-12*exp(350/T)  |
| MCO3 + NO -> MO2 + NO2 + (CO2)                                                                                                                    | 8.10E-12*exp(270/T)  |
| RCO3 + NO -> NO2 + ETO2                                                                                                                           | 6.70E-12*exp(340/T)  |
| MAO3 + NO -> NO2 + 0.5CH2O + 0.5CO + (CO2) + 0.5MO2 + 0.5MCO3                                                                                     | 6.70E-12*exp(340/T)  |
| ATO2 + NO -> 0.96NO2 + 0.960CH2O + 0.960MCO3 + 0.04R4N2                                                                                           | 2.80E-12*exp(300/T)  |
| RIO2 + HO2 -> 0.88RIP + 0.12OH + 0.047MACR + 0.073MVK + 0.12HO2 + 0.12CH2O                                                                        | 2.06E-13*exp(1300/T) |
| VRO2 + HO2 -> 0.1VRP + 0.68OH + 0.578GLYC + 0.578MCO3 + 0.187MEK + 0.102HO2 + 0.102CH2O + 0.102MGLY + 0.033RCHO                                   | 1.82E-13*exp(1300/T) |
| MRO2 + HO2 -> 1.0MRP                                                                                                                              | 1.82E-13*exp(1300/T) |
| MAN2 + HO2 -> 0.075PROPNN + 0.075CO + 0.075HO2 + 0.075MGLY + 0.075CH2O + 0.075NO2 + 0.15OH + 0.85ISNP                                             | 1.82E-13*exp(1300/T) |
| IEPOXOO + HO2 -> 0.725HAC + 0.275GLYC + 0.275GLYX + 0.275MGLY + 1.125OH + 0.825HO2 + (0.200CO2) + 0.375CH2O + 0.074HCOOH + 0.251CO                | 2.06E-13*exp(1300/T) |
| DIBOO + HO2 -> 0.15HO2 + 0.15OH + 0.078GLYC + 0.078MGLY + 0.072HAC + 0.072GLYX + 0.85R4P                                                          | 2.06E-13*exp(1300/T) |
| MAOPO2 + HO2 -> 1.0HAC + (1.0CO2) + 2.0OH                                                                                                         | 1.82E-13*exp(1300/T) |

---

|                                                                                                                                                                            |                      |
|----------------------------------------------------------------------------------------------------------------------------------------------------------------------------|----------------------|
| HC5OO + HO2 -> 0.1IAP + 0.9OH + 0.9MGLY + 0.9GLYC + 0.9HO2                                                                                                                 | 2.06E-13*exp(1300/T) |
| ISOPNDO2 + HO2 -> 0.5OH + 0.035MACRN + 0.155HCOOH +<br>0.22HAC + 0.065ETHLN + 0.325CH2O + 0.170NO2 + 0.075GLYC +<br>0.155NO3 + 0.075PROPNN + 0.170MEK + 0.175HO2 + 0.5ISNP | 2.06E-13*exp(1300/T) |
| ISOPNBO2 + HO2 -> 0.3GLYC + 0.3HAC + 0.2CH2O + 0.13MACRN<br>+ 0.07MVKN + 0.3NO2 + 0.2HO2 + 0.5OH + 0.5ISNP                                                                 | 2.06E-13*exp(1300/T) |
| MACRNO2 + HO2 -> 0.08ACTA + 0.08CH2O + 0.15NO3 +<br>0.07HCOOH + 0.07MGLY + 0.85HAC + 0.85NO2 + (0.93CO2) +<br>1.0OH                                                        | 1.82E-13*exp(1300/T) |
| MOBAOO + HO2 -> 0.15OH + 0.15HO2 + 0.15RCHO + (0.15CO2) +<br>0.85R4P                                                                                                       | 2.06E-13*exp(1300/T) |
| MCO3 + HO2 -> 0.15ACTA + 0.15O3 + 0.44OH + 0.44MO2 +<br>0.41MAP                                                                                                            | 5.20E-13*exp(980/T)  |
| RCO3 + HO2 -> 0.410RP + 0.150RCOOH + 0.150O3 + 0.440OH +<br>0.440ETO2                                                                                                      | 4.30E-13*exp(1040/T) |
| ATO2 + HO2 -> 0.15MCO3 + 0.15OH + 0.15CH2O + 0.85ATO2H                                                                                                                     | 8.60E-13*exp(700/T)  |
| KO2 + HO2 -> 0.15OH + 0.15ALD2 + 0.15MCO3 + 0.85ATO2H                                                                                                                      | 1.82E-13*exp(1300/T) |
| MAO3 + HO2 -> 0.44OH + 0.15O3 + 0.59CH2O + 0.39MO2 +<br>0.41MAOP + 0.39CO                                                                                                  | 4.30E-13*exp(1040/T) |
| RIO2 + MO2 -> 1.1HO2 + 1.22CH2O + 0.280MVK + 0.180MACR +<br>0.3HC5 + 0.24MOH + 0.24ROH                                                                                     | 8.37E-14             |
| HC5OO + MO2 -> 0.5HO2 + 0.33CO + 0.09H2 + 0.18HAC +<br>0.13GLYC + 0.29MGLY + 0.25MEK + 0.95CH2O + 0.25MOH +<br>0.25ROH + 0.5HO2                                            | 8.37E-14             |
| MRO2 + MO2 -> 0.595HAC + 0.255MGLY + 0.595CO + 1.255CH2O<br>+ 1.7HO2 + 0.150ROH                                                                                            | 8.37E-14             |
| VRO2 + MO2 -> 0.14HO2 + 0.14CH2O + 0.36MCO3 + 0.36GLYC +<br>0.14MGLY + 0.25MEK + 0.75CH2O + 0.25MOH + 0.25ROH +<br>0.5HO2                                                  | 8.37E-14             |
| MAN2 + MO2 -> 0.375PROPNN + 0.375CO + 0.375HO2 +<br>0.375MGLY + 0.375CH2O + 0.375NO2 + 0.250CH2O + 0.250R4N2                                                               | 8.37E-14             |
| MAOPO2 + MO2 -> 0.7HAC + (0.7CO2) + 0.7OH + 1.0CH2O +<br>0.7HO2 + 0.3ROH                                                                                                   | 8.37E-14             |
| 2RIO2 -> 1.28HO2 + 0.92CH2O + 0.56MVK + 0.36MACR + 0.48ROH<br>+ 0.5HC5                                                                                                     | 1.54E-13             |
| 2MAOPO2 -> 2.0HAC + (2.0CO2) + 2.0OH                                                                                                                                       | 8.37E-14             |
| MCO3 + MO2 -> CH2O + MO2 + HO2                                                                                                                                             | 1.80E-12*exp(500/T)  |
| MCO3 + MO2 -> ACTA + CH2O                                                                                                                                                  | 2.00E-13*exp(500/T)  |
| RCO3 + MO2 -> CH2O + HO2 + ETO2                                                                                                                                            | 1.68E-12*exp(500/T)  |
| RCO3 + MO2 -> RCOOH + CH2O                                                                                                                                                 | 1.87E-13*exp(500/T)  |
| MAO3 + MO2 -> CH2O + HO2 + CH2O + MCO3                                                                                                                                     | 1.68E-12*exp(500/T)  |
| MAO3 + MO2 -> RCOOH + CH2O                                                                                                                                                 | 1.87E-13*exp(500/T)  |
| MAOPO2 + MCO3 -> 1.0HAC + (2.0CO2) + OH + MO2                                                                                                                              | 1.68E-12*exp(500/T)  |
| MAOPO2 + MCO3 -> 1.0ACTA + 1.0MEK                                                                                                                                          | 1.87E-13*exp(500/T)  |
| R4O2 + MCO3 -> MO2 + 0.32ACET + 0.19MEK + 0.27HO2 +<br>0.32ALD2 + 0.13RCHO + 0.05A3O2 + 0.18B3O2 + 0.32ETO2                                                                | 1.68E-12*exp(500/T)  |
| R4O2 + MCO3 -> 1.0ACTA + 1.0MEK                                                                                                                                            | 1.87E-13*exp(500/T)  |
| ATO2 + MCO3 -> MCO3 + CH2O + MO2                                                                                                                                           | 1.68E-12*exp(500/T)  |
| ATO2 + MCO3 -> MGLY + ACTA                                                                                                                                                 | 1.87E-13*exp(500/T)  |
| HC5OO + MCO3 -> 0.216GLYX + 0.234MGLY + 0.234GLYC +<br>0.216HAC + 0.29DHMOB + 0.17MOBA + 0.09RCHO + HO2 +                                                                  | 1.68E-12*exp(500/T)  |

---

|                                                                                                                                                |                            |
|------------------------------------------------------------------------------------------------------------------------------------------------|----------------------------|
| 0.09CO + MO2                                                                                                                                   |                            |
| HC5OO + MCO3 -> MEK + ACTA                                                                                                                     | 1.87E-13*exp(500/T)        |
| VRO2 + MCO3 -> 0.4HO2 + 0.4CH2O + 0.6MCO3 + 0.6GLYC +<br>0.4MGLY + 1.0MO2                                                                      | 1.68E-12*exp(500/T)        |
| VRO2 + MCO3 -> MEK + ACTA                                                                                                                      | 1.87E-13*exp(500/T)        |
| MRO2 + MCO3 -> 0.850HO2 + 0.143MGLY + 0.857HAC + 0.857CO<br>+ 0.143CH2O + 1.0MO2                                                               | 1.68E-12*exp(500/T)        |
| MRO2 + MCO3 -> MEK + ACTA                                                                                                                      | 1.87E-13*exp(500/T)        |
| MAN2 + MCO3 -> 0.5PROPNN + 0.5CO + 0.5HO2 + 0.5MGLY +<br>0.5CH2O + 0.5NO2 + (CO2) + MO2                                                        | 1.68E-12*exp(500/T)        |
| MAN2 + MCO3 -> RCHO + ACTA + NO2                                                                                                               | 1.87E-13*exp(500/T)        |
| RIO2 + MCO3 -> 0.887HO2 + 0.747CH2O + 0.453MVK +<br>0.294MACR + 0.140HC5 + 0.113DIBOO + (CO2) + MO2                                            | 1.68E-12*exp(500/T)        |
| RIO2 + MCO3 -> MEK + ACTA                                                                                                                      | 1.87E-13*exp(500/T)        |
| MCO3 + MCO3 -> 2MO2                                                                                                                            | 2.50E-12*exp(500/T)        |
| RCO3 + MCO3 -> MO2 + ETO2                                                                                                                      | 2.50E-12*exp(500/T)        |
| MAO3 + MCO3 -> MO2 + MCO3 + CH2O                                                                                                               | 2.50E-12*exp(500/T)        |
| MCO3 + NO2 -> PAN                                                                                                                              | 8.59E-12                   |
| PAN -> MCO3 + NO2                                                                                                                              | 5.73E-04                   |
| RCO3 + NO2 -> PPN                                                                                                                              | 7.40E-12                   |
| PPN -> RCO3 + NO2                                                                                                                              | 4.44E-04                   |
| MAO3 + NO2 -> PMN                                                                                                                              | 7.40E-12                   |
| PMN -> MAO3 + NO2                                                                                                                              | 4.44E-04                   |
| MACRNO2 + NO2 -> PMNN                                                                                                                          | 7.40E-12                   |
| PMNN -> MACRNO2 + NO2                                                                                                                          | 4.44E-04                   |
| ISOP + O3 -> 0.244MVK + 0.325MACR + 0.845CH2O + 0.110H2O2 +<br>0.522CO + 0.204HCOOH + 0.199MCO3 + 0.026HO2 + 0.270OH +<br>0.128PRPE + 0.051MO2 | 1.00E-14*exp(-1970/T)      |
| MVK + O3 -> 0.202OH + 0.202HO2 + 0.352HCOOH + 0.535CO +<br>0.050ALD2 + 0.950MGLY + 0.050CH2O                                                   | 8.50E-16*exp(-1520/T)      |
| MACR + O3 -> 0.261OH + 0.202HO2 + 0.326HCOOH + 0.569CO +<br>0.880MGLY + 0.120CH2O                                                              | 1.40E-15*exp(-2100/T)      |
| HC5 + O3 -> 0.6MGLY + 0.1OH + 0.12CH2O + 0.28GLYC + 0.3O3 +<br>0.4CO + 0.2H2 + 0.2HAC + 0.2HCOOH                                               | 6.16E-15*exp(-1814/T)      |
| ISOPNB + O3 -> 0.610MVKN + 0.390MACRN + 0.27OH + CH2O                                                                                          | 1.06E-16                   |
| ISOPND + O3 -> 0.5PROPNN + 0.5ETHLN + 0.27OH + 0.5GLYC +<br>0.5HAC                                                                             | 5.30E-17                   |
| MOBA + O3 -> OH + HO2 + (CO2) + MEK                                                                                                            | 2.00E-17                   |
| PMN + O3 -> NO2 + 0.6CH2O + HO2                                                                                                                | 8.20E-18                   |
| RIO2 -> 2.0HO2 + 1.0CH2O + 0.5MGLY + 0.5GLYC + 0.5GLYX +<br>0.500HAC + 1.0OH                                                                   | 4.07E+08*exp(-7694/T)      |
| MRO2 -> 1.0CO + 1.0HAC + 1.0OH                                                                                                                 | 2.90E+07*exp(-5297/T)      |
| C10H16 + OH -> TERPO2                                                                                                                          | 1.20E-11*exp(444/T)        |
| C10H16 + O3 -> .7OH + MVK + MACR + HO2                                                                                                         | 1.00E-15*exp(-732/T)       |
| C10H16 + NO3 -> TERPO2 + NO2                                                                                                                   | 1.20E-12*exp(490/T)        |
| TERPO2 + NO -> .1ACET + MVK + MACR + NO2                                                                                                       | 4.20E-12*exp(180/T)        |
| TERPO2 + HO2 -> TERPOOH                                                                                                                        | 7.50E-13*exp(700/T)        |
| TERPOOH + OH -> TERPO2                                                                                                                         | 3.80E-12*exp(200/T)        |
| O3 -> O2 + O1D                                                                                                                                 | 2.80E-04*exp(-1.75/cos(x)) |
| O3 -> O2 + O                                                                                                                                   | 6.76E-04*exp(-0.30/cos(x)) |

---



---

|                                                                                                                         |                            |
|-------------------------------------------------------------------------------------------------------------------------|----------------------------|
| H2O2 -> 2OH                                                                                                             | 2.10E-05*exp(-0.86/cos(x)) |
| NO2 -> NO + O                                                                                                           | 1.71E-02*exp(-0.55/cos(x)) |
| NO3 -> NO + O2                                                                                                          | 3.03E-02*exp(-0.22/cos(x)) |
| NO3 -> NO2 + O                                                                                                          | 2.49E-01*exp(-0.25/cos(x)) |
| N2O5 -> NO3 + NO + O                                                                                                    | 1.02E-06*exp(-5.50/cos(x)) |
| N2O5 -> NO3 + NO2                                                                                                       | 1.25E-04*exp(-0.85/cos(x)) |
| HNO3 -> OH + NO2                                                                                                        | 2.8E-06*exp(-1.20/cos(x))  |
| HO2NO2 -> HO2 + NO2                                                                                                     | 2.05E-05*exp(-1.20/cos(x)) |
| CH2O -> 2HO2 + CO                                                                                                       | 1.05E-04*exp(-1.00/cos(x)) |
| CH2O -> H2 + CO                                                                                                         | 1.25E-04*exp(-0.80/cos(x)) |
| MP -> CH2O + HO2 + OH                                                                                                   | 1.65E-05*exp(-0.88/cos(x)) |
| ALD2 -> MO2 + HO2 + CO                                                                                                  | 2.95E-05*exp(-1.40/cos(x)) |
| ALD2 -> CH4 + CO                                                                                                        | 1.25E-08*exp(-6.00/cos(x)) |
| PAN -> 0.6MCO3 + 0.6NO2 + 0.4MO2 + 0.4NO3                                                                               | 2.5E-06*exp(-1.00/cos(x))  |
| RCHO -> ETO2 + HO2 + CO                                                                                                 | 7.35E-05*exp(-1.10/cos(x)) |
| ACET -> MCO3 + MO2                                                                                                      | 3.76E-06*exp(-1.80/cos(x)) |
| MEK -> 0.85MCO3 + 0.85ETO2 + 0.15MO2 + 0.15RCO3                                                                         | 3.05E-05*exp(-1.20/cos(x)) |
| GLYC -> CH2O + 2.0HO2 + CO                                                                                              | 2.20E-05*exp(-1.20/cos(x)) |
| GLYX -> 2.0CO + 2.0HO2                                                                                                  | 1.16E-04*exp(-0.45/cos(x)) |
| MGLY -> MCO3 + CO + HO2                                                                                                 | 2.60E-04*exp(-0.60/cos(x)) |
| MVK -> PRPE + CO                                                                                                        | 6.72E-06*exp(-0.77/cos(x)) |
| MVK -> MCO3 + CH2O + CO + HO2                                                                                           | 2.24E-06*exp(-0.77/cos(x)) |
| MVK -> MO2 + MAO3                                                                                                       | 2.24E-06*exp(-0.77/cos(x)) |
| MACR -> MAO3 + HO2                                                                                                      | 5.85E-06*exp(-0.60/cos(x)) |
| MACR -> CO + HO2 + CH2O + MCO3                                                                                          | 5.85E-06*exp(-0.60/cos(x)) |
| HAC -> MCO3 + CH2O + HO2                                                                                                | 4.05E-06*exp(-1.10/cos(x)) |
| INPN -> OH + HO2 + RCHO + NO2                                                                                           | 1.65E-05*exp(-0.88/cos(x)) |
| PRPN -> OH + HO2 + RCHO + NO2                                                                                           | 1.65E-05*exp(-0.88/cos(x)) |
| ETP -> OH + HO2 + ALD2                                                                                                  | 1.65E-05*exp(-0.88/cos(x)) |
| RA3P -> OH + HO2 + RCHO                                                                                                 | 1.65E-05*exp(-0.88/cos(x)) |
| RB3P -> OH + HO2 + ACET                                                                                                 | 1.65E-05*exp(-0.88/cos(x)) |
| R4P -> OH + HO2 + RCHO                                                                                                  | 1.65E-05*exp(-0.88/cos(x)) |
| PP -> OH + HO2 + ALD2 + CH2O                                                                                            | 1.65E-05*exp(-0.88/cos(x)) |
| RP -> OH + HO2 + ALD2                                                                                                   | 1.65E-05*exp(-0.88/cos(x)) |
| RIP -> OH + HO2 + 0.710CH2O + 0.425MVK + 0.285MACR +<br>0.29HC5                                                         | 1.65E-05*exp(-0.88/cos(x)) |
| IAP -> OH + HO2 + 0.67CO + 0.190H2 + 0.36HAC + 0.26GLYC +<br>0.580MGLY                                                  | 1.65E-05*exp(-0.88/cos(x)) |
| ISNP -> OH + HO2 + RCHO + NO2                                                                                           | 1.65E-05*exp(-0.88/cos(x)) |
| VRP -> OH + 0.3HO2 + 0.3CH2O + 0.7MCO3 + 0.7GLYC + 0.3MGLY                                                              | 1.65E-05*exp(-0.88/cos(x)) |
| MRP -> OH + HO2 + HAC + CO + CH2O                                                                                       | 1.65E-05*exp(-0.88/cos(x)) |
| MAOP -> OH + CH2O + MCO3                                                                                                | 1.65E-05*exp(-0.88/cos(x)) |
| R4N2 -> NO2 + 0.320ACET + 0.190MEK + 0.180MO2 + 0.270HO2 +<br>0.320ALD2 + 0.130RCHO + 0.050A3O2 + 0.180B3O2 + 0.320ETO2 | 3.94E-06*exp(-1.20/cos(x)) |
| MAP -> OH + MO2                                                                                                         | 1.65E-05*exp(-0.88/cos(x)) |
| MACRN -> NO2 + HAC + MGLY + 0.5CH2O + HO2 + 0.5CO                                                                       | 2.50E-06*exp(-1.00/cos(x)) |
| MVKN -> GLYC + NO2 + MCO3                                                                                               | 2.50E-06*exp(-1.00/cos(x)) |
| ISOPNB -> HC5 + NO2 + HO2                                                                                               | 2.50E-06*exp(-1.00/cos(x)) |

---

---

|                                 |                            |
|---------------------------------|----------------------------|
| ISOPND -> HC5 + NO2 + HO2       | 2.50E-06*exp(-1.00/cos(x)) |
| PROPNN -> CH2O + NO2 + CO + MO2 | 2.50E-06*exp(-1.00/cos(x)) |
| ATOOH -> OH + CH2O + MCO3       | 1.65E-05*exp(-0.88/cos(x)) |

---

1

2 <sup>a</sup>The stoichiometric coefficient is in accordance with 12% ISOPN yield.

3

4

5

6

7

8

9

10

11

12

13

14

15

16

17

18

19

20

21

22

23

24

1  
2  
3  
4  
5  
6  
7  
8  
9  
10  
11

Table S4. The relationship between solar zenith angle (sza) and photolysis rates ( $j = a \cdot \exp(b/\cos(\text{sza}))$ ), which are obtained from the TUV radiation model. Adjusted  $R^2$  indicates the adjusted correlation coefficient for each curve fitting result. The last two columns show the photolysis rates obtained from TUV simulations and NCAR C-130 observations at 10:37 CST (which corresponds to sza of 0.32), respectively. J-value observations onboard NCAR C-130 over the AABC and SEARCH sites are available on 06/14/2013. The j-values collected below pressure altitude of 1000 m while over the two ground sites are averaged and used here (sampling time ranges between 10:02 CST and 11:11 CST with middle sampling time at 10:37 CST). NA indicates no observations were available for the specific reaction.

| Number | Reaction                        | a       | b     | Adjusted $R^2$ | TUV (s-1) | C-130 (s-1) |
|--------|---------------------------------|---------|-------|----------------|-----------|-------------|
| R_01   | O3 -> O2 + O(1D)                | 2.80E-4 | -1.75 | 0.996          | 4.47E-05  | 3.74E-05    |
| R_02   | O3 -> O2 + O(3P)                | 6.76E-4 | -0.30 | 0.996          | 4.92E-04  | NA          |
| R_03   | H2O2 -> 2 OH                    | 2.10E-5 | -0.86 | 0.993          | 8.42E-06  | 7.96E-06    |
| R_04   | NO2 -> NO + O(3P)               | 1.88E-2 | -0.50 | 0.999          | 1.11E-02  | 9.48E-03    |
| R_05   | NO3 -> NO + O2                  | 3.03E-2 | -0.22 | 0.998          | 2.40E-02  | NA          |
| R_06   | NO3 -> NO2 + O(3P)              | 2.49E-1 | -0.25 | 0.999          | 1.91E-01  | NA          |
| R_07   | N2O5 -> NO3 + NO + O(3P)        | 1.02E-6 | -5.50 | 0.998          | 3.03E-09  | NA          |
| R_08   | N2O5 -> NO3 + NO2               | 1.25E-4 | -0.85 | 0.994          | 5.09E-05  | 4.73E-05    |
| R_09   | HNO2 -> OH + NO                 | 3.85E-3 | -0.50 | 0.995          | 2.26E-03  | 1.54E-03    |
| R_10   | HNO3 -> OH + NO2                | 2.80E-6 | -1.20 | 0.993          | 7.93E-07  | 6.82E-07    |
| R_11   | HNO4 -> HO2 + NO2               | 2.05E-5 | -1.20 | 0.995          | 5.80E-06  | 7.22E-06    |
| R_12   | CH2O -> H + HCO                 | 1.05E-4 | -1.00 | 0.996          | 3.68E-05  | 3.53E-05    |
| R_13   | CH2O -> H2 + CO                 | 1.25E-4 | -0.80 | 0.990          | 5.37E-05  | 5.38E-05    |
| R_14   | CH3CHO -> CH3 + HCO             | 2.95E-5 | -1.40 | 0.996          | 6.74E-06  | 5.79E-06    |
| R_15   | CH3CHO -> CH4 + CO              | 1.25E-8 | -6.00 | 0.992          | 2.16E-11  | NA          |
| R_16   | C2H5CHO -> C2H5 + HCO           | 7.35E-5 | -1.10 | 0.988          | 2.28E-05  | 1.94E-05    |
| R_17   | CH2(OH)CHO -> Products          | 2.20E-5 | -1.20 | 0.995          | 6.23E-06  | NA          |
| R_18   | CH2=C(CH3)CHO -> Products       | 1.17E-5 | -0.60 | 0.996          | 6.21E-06  | NA          |
| R_19   | CH3COCH3 -> CH3CO + CH3         | 3.76E-6 | -1.80 | 0.992          | 5.61E-07  | 1.20E-06    |
| R_20   | CH3COCH2CH3 -> Products         | 1.12E-5 | -0.77 | 0.991          | 4.92E-06  | NA          |
| R_21   | CH3COCH2CH3 -> CH3CO + CH2CH3   | 3.05E-5 | -1.20 | 0.994          | 8.52E-06  | 7.26E-06    |
| R_22   | CH2(OH)COCH3 -> CH3CO + CH2(OH) | 4.05E-6 | -1.10 | 0.990          | 1.26E-06  | NA          |
| R_23   | CH3OOH -> CH3O + OH             | 1.65E-5 | -0.88 | 0.991          | 6.44E-06  | NA          |
| R_24   | CH3CO(OOH) -> Products          | 2.74E-6 | -1.00 | 0.994          | 9.68E-07  | NA          |
| R_25   | CH3ONO2 -> CH3O + NO2           | 3.94E-6 | -1.20 | 0.994          | 1.12E-06  | NA          |
| R_26   | CH3CO(OONO2) -> CH3CO(OO) + NO2 | 1.51E-6 | -1.00 | 0.992          | 5.26E-07  | 5.54E-07    |
| R_27   | CH3CO(OONO2) -> CH3CO(O) +      | 1.00E-6 | -1.00 | 0.993          | 3.51E-07  | 2.37E-07    |

|      |                                          | NO3     |       |       |          |          |
|------|------------------------------------------|---------|-------|-------|----------|----------|
| R_28 | CH3CH2CO(OONO2) -><br>CH3CH2CO(OO) + NO2 | 2.50E-6 | -1.00 | 0.992 | 8.68E-07 | NA       |
| R_29 | CHOCHO -> HCO + HCO                      | 1.16E-4 | -0.45 | 0.998 | 7.22E-05 | 7.59E-05 |
| R_30 | CH3COCHO -> CH3CO + HCO                  | 2.60E-4 | -0.60 | 0.996 | 1.38E-04 | 1.45E-04 |

---

- 1
- 2
- 3
- 4
- 5
- 6
- 7
- 8
- 9
- 10
- 11
- 12
- 13
- 14
- 15
- 16
- 17
- 18
- 19
- 20
- 21
- 22
- 23

1  
2  
3  
4

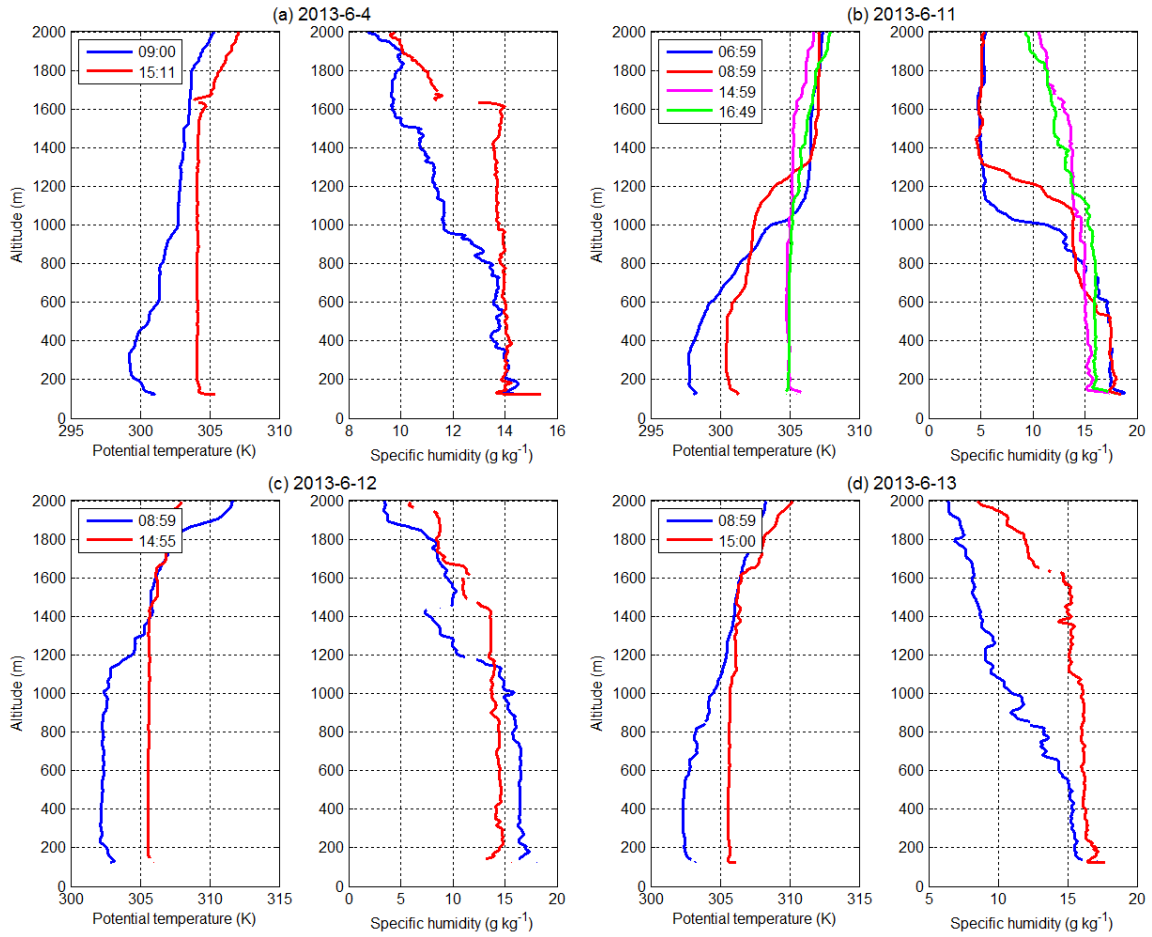

5

6 Figure S1. Vertical profiles of potential temperature and specific humidity collected from the  
7 sounding system at the SEARCH site on (a) 2013-6-4, (b) 2013-6-11, (c) 2013-6-12, and (d)  
8 2013-6-13. Time series shown in the legend are in CST. Data shown here are representative  
9 of the other sampling days in this study.

10  
11  
12  
13  
14

1  
2  
3  
4  
5  
6

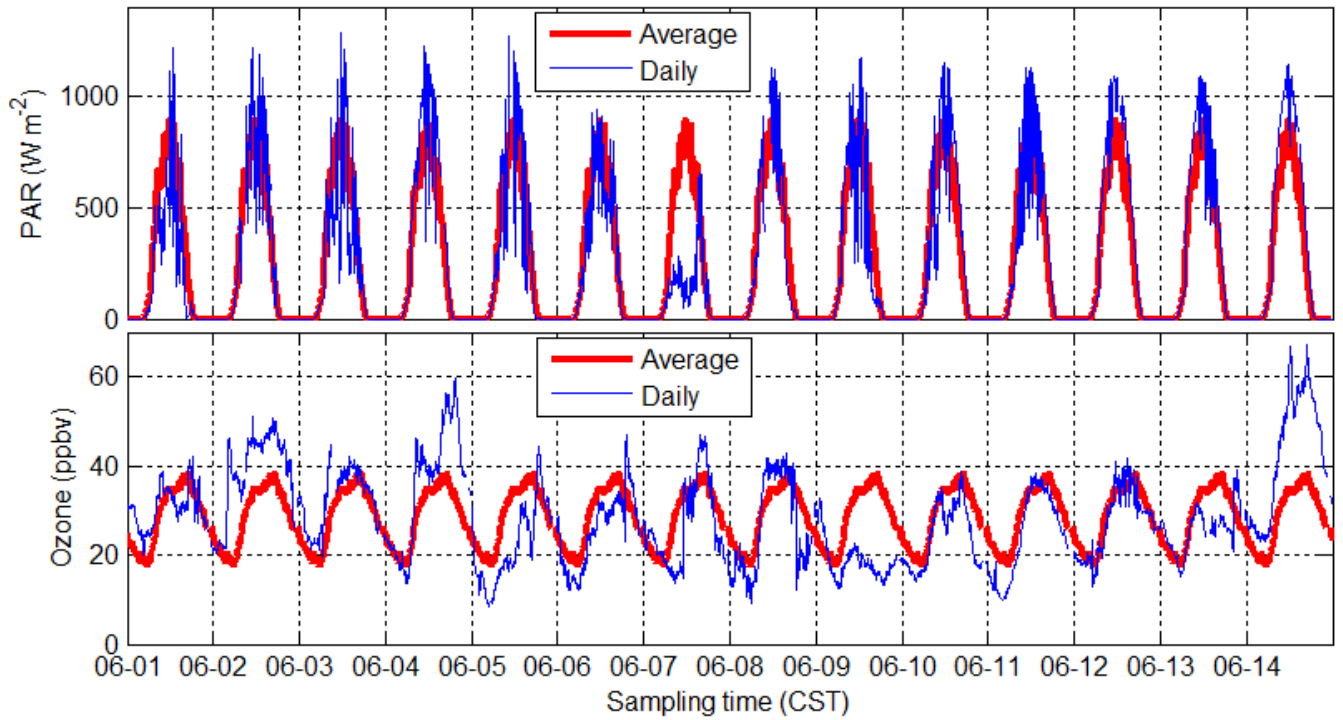

7

8 Figure S2. Top panel, photosynthetically active radiation (PAR) measured at 32 m on the  
9 AABC flux tower. Bottom panel, ozone mixing ratios measured at the SEARCH site. x-axis  
10 show sampling time in month-day. Thin blue line indicates daily measurements. Bold red line  
11 indicates a one-day diurnal profile obtained by averaging the data between 2013-6-1 and  
12 2013-6-14, which is then duplicated for each day to show the deviation of daily profile from  
13 the averaged profile.

14  
15  
16  
17

1  
2  
3  
4  
5  
6  
7  
8

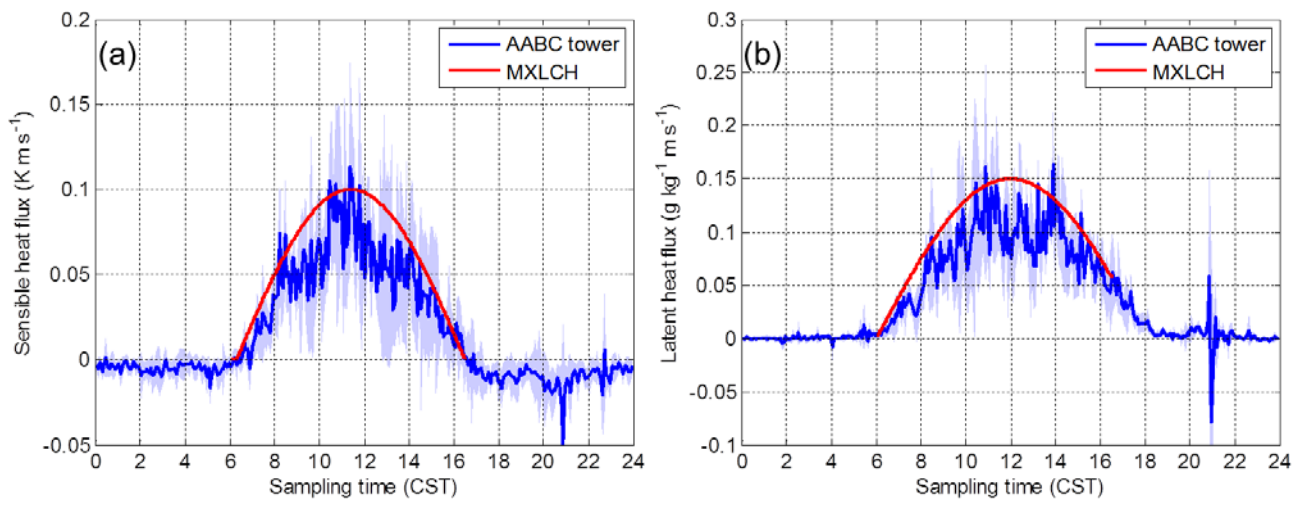

9

10 Figure S3. Diurnal evolution of (a) surface sensible heat flux, (b) surface latent heat flux. The  
11 blue lines indicate the averaged data obtained from the AABC tower over the low cloud cover  
12 days (June 10-13). The shaded areas indicate 1 standard deviation of the observations. The red  
13 line indicates the fitted curve, which is prescribed to MXLCH.

14  
15  
16  
17  
18  
19  
20

1  
2  
3  
4  
5  
6  
7

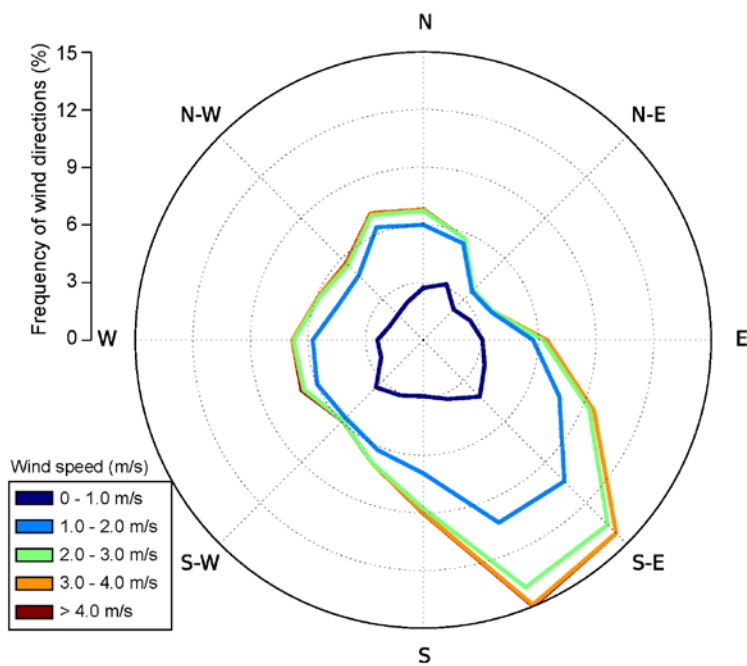

8

9 Figure S4. Summary of the horizontal wind data during 06:00-16:30 CST of the selected days  
10 (June 5, 6, 8, 10-13, 2013). The wind data were collected on top of the AABC flux tower at  
11 44 m height above the ground level.

12  
13  
14  
15  
16



1  
2  
3  
4  
5  
6  
7  
8

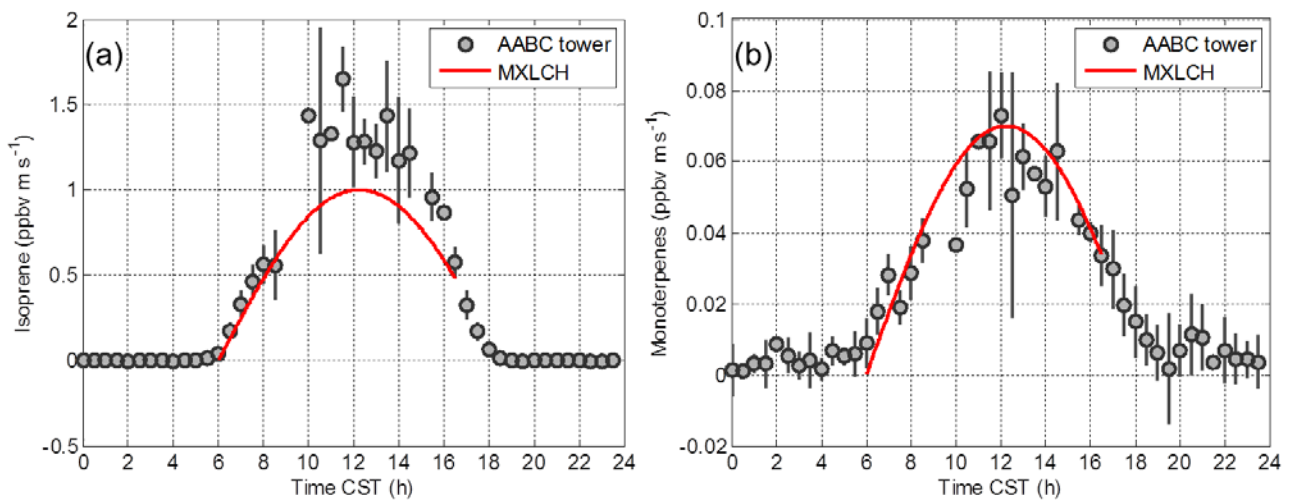

9

10 Figure S5. Diurnal evolution of (a) isoprene flux, (b) monoterpenes fluxes. The circles  
11 indicate averaged flux during within the time bin (30 min). Error bars indicate 1 standard  
12 deviation. The red line indicates the fitted curve, which is prescribed to MXLCH. The  
13 isoprene peak flux value prescribed in MXLCH is on the lower bound of the observations.

14  
15  
16  
17  
18  
19

1  
2  
3  
4  
5  
6  
7  
8

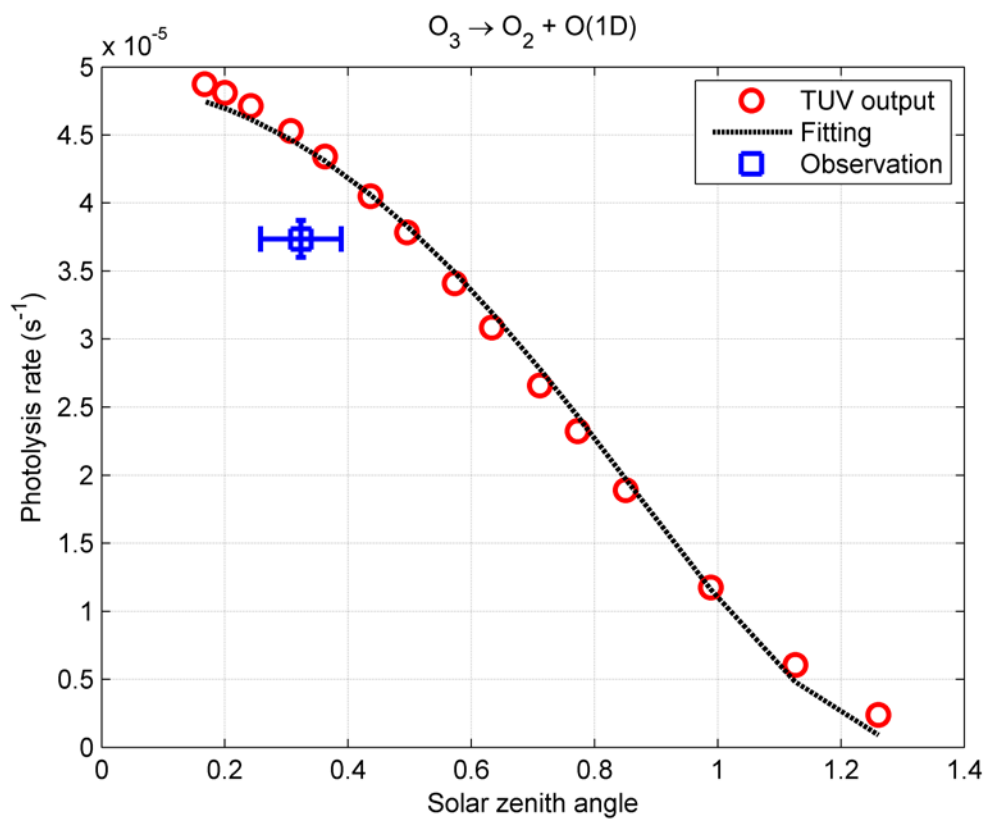

9

10 Figure S6. Comparison of TUV outputs with observation for photolysis reaction  $O_3 \rightarrow O_2 +$   
11  $O(1D)$ . Error bars indicate 1 standard deviation. See Table S4 for curve fitting parameters and  
12 methods of processing the observational data.

13

14

15

1  
2  
3  
4  
5

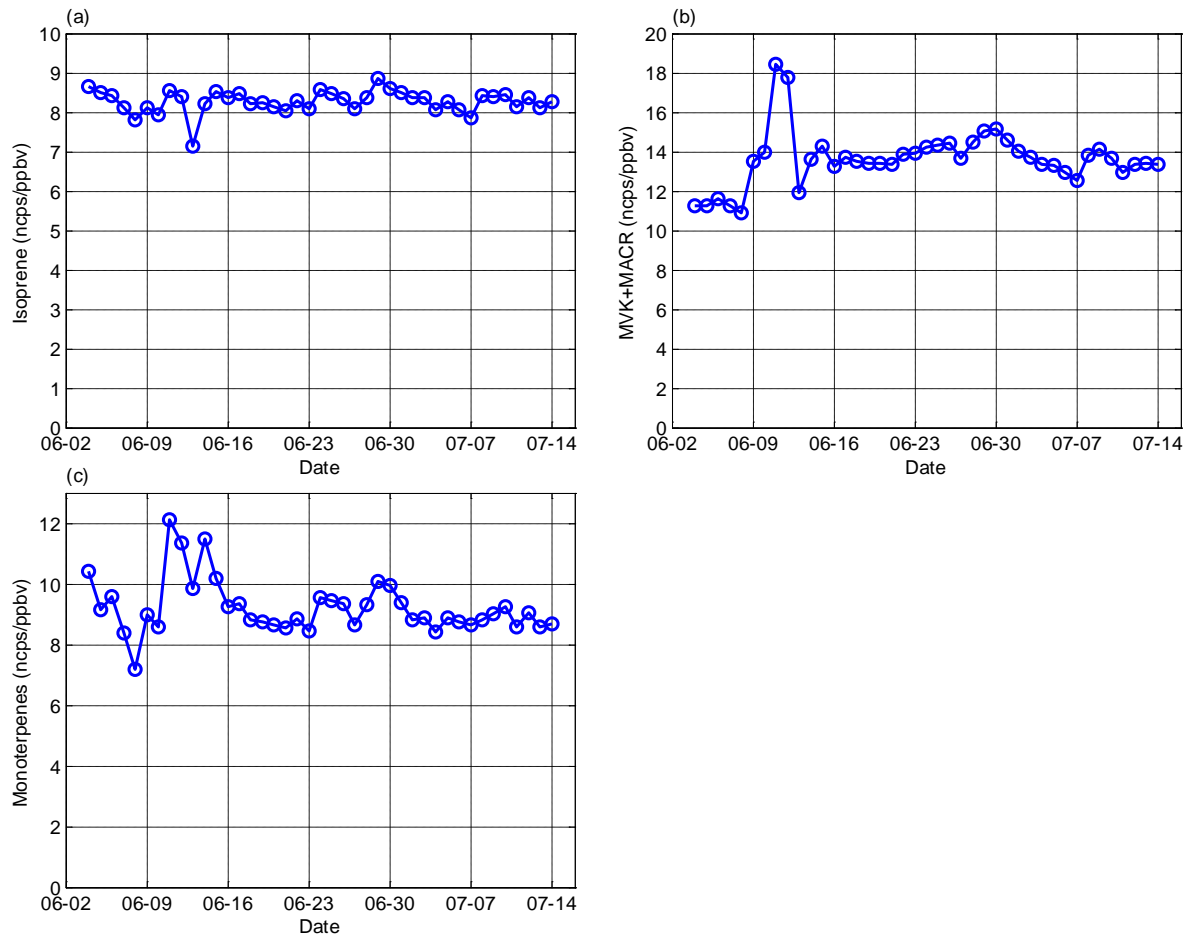

6  
7  
8  
9  
10  
11  
12  
13

Figure S7. Summary of the sensitivities for (a) isoprene, (b) MVK+MACR, and (c) monoterpenes obtained from standard gas calibrations during the whole campaign period.

1

## 2 **References**

3 Cappellin, L., Karl, T., Probst, M., Ismailova, O., Winkler, P. M., Soukoulis, C., Aprea, E.,  
4 Mark, T. D., Gasperi, F., and Biasioli, F.: On Quantitative Determination of Volatile Organic  
5 Compound Concentrations Using Proton Transfer Reaction Time-of-Flight Mass  
6 Spectrometry, *Environ Sci Technol*, 46, 2283-2290, 2012.

7 Li, J. W.: Development and evaluation of flexible empirical peak functions for processing  
8 chromatographic peaks, *Anal Chem*, 69, 4452-4462, Doi 10.1021/Ac970481d, 1997.

9 Nguyen, T. B., Crouse, J. D., Schwantes, R. H., Teng, A. P., Bates, K. H., Zhang, X., St  
10 Clair, J. M., Brune, W. H., Tyndall, G. S., Keutsch, F. N., Seinfeld, J. H., and Wennberg, P.  
11 O.: Overview of the Focused Isoprene eXperiment at the California Institute of Technology  
12 (FIXCIT): mechanistic chamber studies on the oxidation of biogenic compounds, *Atmos*  
13 *Chem Phys*, 14, 13531-13549, 10.5194/acp-14-13531-2014, 2014.

14
